# Supplementary material
Source: PubMed Central journal article supplement (PMC3535461)
Supplement: NIHMS404231-supplement-SI.pdf [file NIHMS404231-supplement-SI.pdf]

## Supporting Information for

# Thermoresponsive nanocomposite double network hydrogels

Ruochong Fei, Jason Thomas George, Jeehyun Park and Melissa Ann Grunlan

Department of Biomedical Engineering, Texas A&M University, College Station, TX77843

\*Corresponding author. E-mail address: [mgrunlan@tamu.edu](mailto:mgrunlan@tamu.edu)

**Table S1.** % Uncrosslinked material of hydrogels

| Notation     | 1 <sup>st</sup> Network |           | 2 <sup>nd</sup> Network |           | Uncrosslinked Content |
|--------------|-------------------------|-----------|-------------------------|-----------|-----------------------|
|              | %BIS                    | NP (size) | %BIS                    | NP (size) | %                     |
| <b>SN</b>    | 4%                      | --        | --                      | --        | 5.8 ± 0.3             |
| <b>DN</b>    | 4%                      | --        | 0.2%                    | --        | 0.4 ± 0.2             |
| <b>50-1</b>  | 4%                      | ~50 nm    | 0.2%                    | --        | 1.6 ± 1.2             |
| <b>50-2</b>  | 4%                      | --        | 0.2%                    | ~50 nm    | 1.2 ± 0.8             |
| <b>200-1</b> | 4%                      | ~200 nm   | 0.2%                    | --        | 1.5 ± 0.8             |
| <b>200-2</b> | 4%                      | --        | 0.2%                    | ~200 nm   | 0.6 ± 0.2             |
